# Supplementary material
Source: HighWire-hosted journal article supplement (https://jmg.bmj.com/content/jmedgenet-2018-105700)
Supplement: inline-supplementary-material-1 [file inline-supplementary-material-1.docx]

**Supplementary Table 1.** Breakdown of study population according to phenotype and number of mutations identified in the whole 135-gene panel.

| Phenotype | Patients | Pathogenic/likely pathogenic mutation | % |
| --- | --- | --- | --- |
| Hereditary breast-ovarian cancer syndrome | 633 | 132 | 20.85 |
| Hereditary nonpolyposis colorectal cancer | 210 | 63 | 30.00 |
| (Attenuated) Familial adenomatous polyposis | 77 | 9 | 11.69 |
| Li-Fraumeni syndrome | 15 | 3 | 20.00 |
| Other | 88 | 20 | 22.73 |
| TOTAL | 1023 | 227 | 22.19 |

**Supplementary Table 2.** Published cancer risk for the genes mutated in our cohort of MINAS patients

| Gene | Cancer risk | Associated risk | Cancer risk / age |
| --- | --- | --- | --- |
| *APC* | Colorectal cancer | Very high | <50 years: 93%[1] |
| *ATM* | Female breast cancer  Pancreatic cancer | Moderate  Low | >50 years:4.94%[2]  Lifetime risk: 2.41%[2] |
| *BARD1* | Female breast cancer | Moderate* [3], [4],[5] | NA |
| *BRCA1* | Female breast cancer  Ovarian cancer  Prostate cancer  Male breast cancer | High  High  Low  Low | <70 years: 60-66%[6], [7]  <70 years: 41-59%[6], [7]  <65 years: 8.6%[8]  <70 years: 1.2%[9] |
| *CHEK2* | Female breast cancer  Prostate cancer  Colorectal cancer | Moderate  Moderate  Low | <80 years: 23-48%[10], [11], [12], [13].  Lifetime risk: 24-44%[14]  Lifetime risk: 7.2-9.5%[15] |
| *ERCC3* | Breast Cancer | Moderate* [16] | NA |
| *EXO1* | Female breast cancer  Lung cancer  Glioma  Gastric cancer | Low*[17]  Low*[17]  Low*[17]  Low*[17] | NA  NA  NA  NA |
| *FANCA* | Female breast cancer | Low* [18], [19], [20] | NA |
| *FLCN* | Renal cancer  Colorectal cancer | Moderate [21]  Low*[22] | Lifetime risk: 16% [21]  NA |
| *FH* | Hereditary leiomyomatosis Renal cell carcinoma  Female breast cancer | High[23]  Moderate[23] [24]  Low[23] | NA  Lifetime risk: 15% [24]  NA |
| *MEN1* | Endocrine tumors | High[25] | NA |
| *MLH1* | Colorectal cancer  Endometrial cancer  Upper GI cancer  Ovarian cancer  Urinary tract | High  High  Moderate  Moderate  Low | <70 years: 46%[26]  <70 years: 34%[26]  <70 years: 18%[26]  <70 years: 11%[26]  <70 years: 2%[26] |
| *PALB2* | Female breast cancer  Pancreatic cancer | High  Low [27], [28] | <70 years:35%[29]  NA |
| *RAD51D* | Ovarian cancer | Moderate | <80 years: 10%[30] |
| *SDHB* | Paraganglioma  Pheochromocytoma | Moderate[31]  Moderate[31] | 30 years: 29%[32]  NA |
| *TP53* | Female breast cancer  Overall cancer risk | High  Very High | <70 years: 54%[33]  <70 years: ~100%[33] |
| *TSC2* | Hamartomas | High[34] | NA |
| *XPA* | Bladder cancer  Lung cancer  Breast cancer | Low*[35]  Low*[36]  Low*[37] | NA |

GI includes gastric, pancreatic biliary tract and duodenal cancers

* More evidence needed

**References**

1 Kory W Jasperson, MS, Swati G Patel, MD, MS, and Dennis J Ahnen M. *APC-Associated Polyposis Conditions*. 1998. www.ncbi.nlm.nih.gov/books/NBK1345/

2 Bakker JL, de Winter JP. A role for ATM in hereditary pancreatic cancer. *Cancer Discov* 2012;**2**:14–5.

3 De Brakeleer S, De Grève J, Loris R, Janin N, Lissens W, Sermijn E, Teugels E. Cancer predisposing missense and protein truncating BARD1 mutations in non-BRCA1 or BRCA2 breast cancer families. *Hum Mutat* 2010;**31**:1175–85.

4 Renaud Sabatier, 1, 2 Jose´ Ade´ laı¨de, 1 Pascal Finetti, 1 Anthony Ferrari, 1 Laetitia Huiart, 3 Hagay Sobol, 3 4, Max Chaffanet, 1 Daniel Birnbaum, 1 and Franc¸ois Bertucci1, 2 4*. BARD1 Homozygous Deletion, a Possible Alternative to BRCA1 Mutation in Basal Breast Cancer. *Genes Chromosomes Cancer* Published Online First: 2010. doi:10.1002/gcc.20822

5 Ratajska M, Antoszewska E, Piskorz A, Brozek I, Borg Å, Kusmierek H, Biernat W, Limon J. Cancer predisposing BARD1 mutations in breast-ovarian cancer families. *Breast Cancer Res Treat* 2012;**131**:89–97.

6 Mavaddat N, Peock S, Frost D, Ellis S, Platte R, Fineberg E, Evans DG, Izatt L, Eeles RA, Adlard J, Davidson R, Eccles D, Cole T, Cook J, Brewer C, Tischkowitz M, Douglas F, Hodgson S, Walker L, Porteous ME, Morrison PJ, Side LE, Kennedy MJ, Houghton C, Donaldson A, Rogers MT, Dorkins H, Miedzybrodzka Z, Gregory H, Eason J, Barwell J, McCann E, Murray A, Antoniou AC, Easton DF. Cancer risks for BRCA1 and BRCA2 mutation carriers: Results from prospective analysis of EMBRACE. *J Natl Cancer Inst* 2013;**105**:812–22.

7 Kuchenbaecker KB, Hopper JL, Barnes DR, Phillips K-A, Mooij TM, Roos-Blom M-J, Jervis S, van Leeuwen FE, Milne RL, Andrieu N, Goldgar DE, Terry MB, Rookus MA, Easton DF, Antoniou AC, McGuffog L, Evans DG, Barrowdale D, Frost D, Adlard J, Ong K, Izatt L, Tischkowitz M, Eeles R, Davidson R, Hodgson S, Ellis S, Nogues C, Lasset C, Stoppa-Lyonnet D, Fricker J-P, Faivre L, Berthet P, Hooning MJ, van der Kolk LE, Kets CM, Adank MA, John EM, Chung WK, Andrulis IL, Southey M, Daly MB, Buys SS, Osorio A, Engel C, Kast K, Schmutzler RK, Caldes T, Jakubowska A, Simard J, Friedlander ML, McLachlan S-A, Machackova E, Foretova L, Tan YY, Singer CF, Olah E, Gerdes A-M, Arver B, Olsson H. Risks of Breast, Ovarian, and Contralateral Breast Cancer for *BRCA1* and *BRCA2* Mutation Carriers. *Jama* 2017;**317**:2402.

8 Leongamornlert D, Mahmud N, Tymrakiewicz M, Saunders E, Dadaev T, Castro E, Goh C, Govindasami K, Guy M, O’Brien L, Sawyer E, Hall A, Wilkinson R, Easton D, Goldgar D, Eeles R, Kote-Jarai Z. Germline BRCA1 mutations increase prostate cancer risk. *Br J Cancer* 2012;**106**:1697–701.

9 Tai YC, Domchek S, Parmigiani G, Chen S. Breast cancer risk among male BRCA1 and BRCA2 mutation carriers. *J Natl Cancer Inst* 2007;**99**:1811–4.

10 Adank MA, Jonker MA, Kluijt I, van Mil SE, Oldenburg RA, Mooi WJ, Hogervorst FBL, van den Ouweland AMW, Gille JJP, Schmidt MK, van der Vaart AW, Meijers-Heijboer H, Waisfisz Q. CHEK2*1100delC homozygosity is associated with a high breast cancer risk in women. *J Med Genet* Published Online First: 2011. doi:10.1136/jmedgenet-2011-100380

11 Causeway W. CHEK2*1100delC and Susceptibility to Breast Cancer: A Collaborative Analysis Involving 10,860 Breast Cancer Cases and 9,065 Controls from 10 Studies. *Am J Hum Genet* 2004;**74**:1175–82.

12 Weischer M, Bojesen SE, Ellervik C, Tybjærg-Hansen A, Nordestgaard BG. CHEK2*1100delC genotyping for clinical assessment of breast cancer risk: Meta-analyses of 26,000 patient cases and 27,000 controls. *J Clin Oncol* 2008;**26**:542–8.

13 Weischer M, Nordestgaard BG, Pharoah P, Bolla MK, Nevanlinna H, Van’t Veer LJ, Garcia-Closas M, Hopper JL, Hall P, Andrulis IL, Devilee P, Fasching PA, Anton-Culver H, Lambrechts D, Hooning M, Cox A, Giles GG, Burwinkel B, Lindblom A, Couch FJ, Mannermaa A, Alnæs GG, John EM, Dörk T, Flyger H, Dunning AM, Wang Q, Muranen TA, Van Hien R, Figueroa J, Southey MC, Czene K, Knight JA, Tollenaar RAEM, Beckmann MW, Ziogas A, Christiaens MR, Collée JM, Reed MWR, Severi G, Marme F, Margolin S, Olson JE, Kosma VM, Kristensen VN, Miron A, Bogdanova N, Shah M, Blomqvist C, Broeks A, Sherman M, Phillips KA, Li J, Liu J, Glendon G, Seynaeve C, Ekici AB, Leunen K, Kriege M, Cross SS, Baglietto L, Sohn C, Wang X, Kataja V, Børresen-Dale AL, Meyer A, Easton DF, Schmidt MK, Bojesen SE. CHEK2*1100delC heterozygosity in women with breast cancer associated with early death, breast cancer-specific death, and increased risk of a second breast cancer. *J Clin Oncol* 2012;**30**:4308–16.

14 Dong X, Wang L, Taniguchi K, Wang X, Cunningham JM, McDonnell SK, Qian C, Marks AF, Slager SL, Peterson BJ, Smith DI, Cheville JC, Blute ML, Jacobsen SJ, Schaid DJ, Tindall DJ, Thibodeau SN, Liu W. Mutations in CHEK2 Associated with Prostate Cancer Risk. *Am J Hum Genet* 2003;**72**:270–80.

15 Cybulski C, Wokołorczyk D, Kładny J, Kurzwaski G, Suchy J, Grabowska E, Gronwald J, Huzarski T, Byrski T, Górski B, Dȩbniak T, Narod SA, Lubiński J. Germline CHEK2 mutations and colorectal cancer risk: Different effects of a missense and truncating mutations? *Eur J Hum Genet* 2007;**15**:237–41.

16 Vijai J, Topka S, Villano D, Ravichandran V, Maxwell KN, Maria A, Thomas T, Gaddam P, Lincoln A, Kazzaz S, Wenz B, Carmi S, Schrader KA, Hart SN, Lipkin SM, Neuhausen SL, Walsh MF, Zhang L, Lejbkowicz F, Rennert H, Stadler ZK, Robson M, Weitzel JN, Domchek S, Daly MJ, Couch FJ, Nathanson KL, Norton L, Rennert G, Offit K. A recurrent ERCC3 truncating mutation confers moderate risk for breast cancer. *Cancer Discov* 2016;**6**:1267–75.

17 Zhang M, Zhao D, Yan C, Zhang L, Liang C. Associations between Nine Polymorphisms in EXO1 and Cancer Susceptibility: A Systematic Review and Meta-Analysis of 39 Case-control Studies. *Sci Rep* 2016;**6**:1–10.

18 Haiman CA, Hsu C, De bakker PIW, Frasco M, Sheng X, Van den berg D, Casagrande JT, Kolonel LN, Le Marchand L, Hankinson SE, Han J, Dunning AM, Pooley KA, Freedman ML, Hunter DJ, Wu AH, Stram DO, Henderson BE. Comprehensive association testing of common genetic variation in DNA repair pathway genes in relationship with breast cancer risk in multiple populations. *Hum Mol Genet* 2008;**17**:825–34.

19 Solyom S, Winqvist R, Nikkilä J, Rapakko K, Hirvikoski P, Kokkonen H, Pylkäs K. Screening for large genomic rearrangements in the FANCA gene reveals extensive deletion in a Finnish breast cancer family. *Cancer Lett* 2011;**302**:113–8.

20 Abbasi S, Rasouli M. A rare FANCA gene variation as a breast cancer susceptibility allele in an Iranian population. *Mol Med Rep* 2017;**15**:3983–8.

21 Houweling AC, Gijezen LM, Jonker MA, Van Doorn MBA, Oldenburg RA, Van Spaendonck-Zwarts KY, Leter EM, Van Os TA, Van Grieken NCT, Jaspars EH, De Jong MM, Bongers EMHF, Johannesma PC, Postmus PE, Van Moorselaar RJA, Van Waesberghe JH, Starink TM, Van Steensel MAM, Gille JJP, Menko FH. Renal cancer and pneumothorax risk in Birt-Hogg-Dubé syndrome; An analysis of 115 FLCN mutation carriers from 35 BHD families. *Br J Cancer* 2011;**105**:1912–9.

22 Nahorski MS, Lim DHK, Martin L, Gille JJP, McKay K, Rehal PK, Ploeger HM, van Steensel M, Tomlinson IP, Latif F, Menko FH, Maher ER. Investigation of the Birt-Hogg-Dube tumour suppressor gene (FLCN) in familial and sporadic colorectal cancer. *J Med Genet* 2010;**47**:385–90.

23 Lehtonen HJ, Kiuru M, Ylisaukko-Oja SK, Salovaara R, Herva R, Koivisto PA, Vierimaa O, Aittomäki K, Pukkala E, Launonen V, Aaltonen LA. Increased risk of cancer in patients with fumarate hydratase germline mutation. *J Med Genet* 2006;**43**:523–6.

24 Africa S. HHS Public Access. 2017;**4**:637–44.

25 Thakker MCL and R V. Multiple Endocrine Neoplasia Type 1 (MEN1): Analysis of 1336 Mutations Reported in the First Decade Following Identification of the Gene. *HUMANMUTATION* Published Online First: 2008. doi:10.1002/humu.20605

26 Møller P, Seppälä T, Bernstein I, Holinski-Feder E, Sala P, Evans DG, Lindblom A, Macrae F, Blanco I, Sijmons R, Jeffries J, Vasen H, Burn J, Nakken S, Hovig E, Rødland EA, Tharmaratnam K, de Vos tot Nederveen Cappel WH, Hill J, Wijnen J, Green K, Lalloo F, Sunde L, Mints M, Bertario L, Pineda M, Navarro M, Morak M, Renkonen-Sinisalo L, Frayling IM, Plazzer J-P, Pylvanainen K, Sampson JR, Capella G, Mecklin J-P, Möslein G. Cancer incidence and survival in Lynch syndrome patients receiving colonoscopic and gynaecological surveillance: first report from the prospective Lynch syndrome database. *Gut* 2017;**66**:464–72.

27 Slater EP, Langer P, Niemczyk E, Strauch K, Butler J, Habbe N, Neoptolemos JP, Greenhalf W, Bartsch DK. PALB2 mutations in European familial pancreatic cancer families. *Clin Genet* 2010;**78**:490–4.

28 Jones S, Hruban RH, Kamiyama M, Borges M, Zhang X, Parsons DW, Lin JC-H, Palmisano E, Brune K, Jaffee EM, Iacobuzio-Donahue CA, Maitra A, Parmigiani G, Kern SE, Velculescu VE, Kinzler KW, Vogelstein B, Eshleman JR, Goggins M, Klein AP. Exomic Sequencing Identifies PALB2 as a Pancreatic Cancer Susceptibility Gene. *Science (80- )* 2009;**324**:217–217.

29 Antoniou AC, Casadei S, Heikkinen T, Barrowdale D, Pylkäs K, Roberts J, Lee A, Subramanian D, De Leeneer K, Fostira F, Tomiak E, Neuhausen SL, Teo ZL, Khan S, Aittomäki K, Moilanen JS, Turnbull C, Seal S, Mannermaa A, Kallioniemi A, Lindeman GJ, Buys SS, Andrulis IL, Radice P, Tondini C, Manoukian S, Toland AE, Miron P, Weitzel JN, Domchek SM, Poppe B, Claes KBM, Yannoukakos D, Concannon P, Bernstein JL, James PA, Easton DF, Goldgar DE, Hopper JL, Rahman N, Peterlongo P, Nevanlinna H, King MC, Couch FJ, Southey MC, Winqvist R, Foulkes WD, Tischkowitz M. Breast-cancer risk in families with mutations in PALB2. *Obstet Gynecol Surv* 2014;**69**:659–60.

30 Loveday C, Turnbull C, Ramsay E, Hughes D, Ruark E, Frankum JR, Bowden G, Kalmyrzaev B, Warren-Perry M, Snape K, Adlard JW, Barwell J, Berg J, Brady AF, Brewer C, Brice G, Chapman C, Cook J, Davidson R, Donaldson A, Douglas F, Greenhalgh L, Henderson A, Izatt L, Kumar A, Lalloo F, Miedzybrodzka Z, Morrison PJ, Paterson J, Porteous M, Rogers MT, Shanley S, Walker L, Eccles D, Evans DG, Renwick A, Seal S, Lord CJ, Ashworth A, Reis-Filho JS, Antoniou AC, Rahman N. Germline mutations in RAD51D confer susceptibility to ovarian cancer. *Nat Genet* 2011;**43**:879–82.

31 Neumann HPH, Bausch B, McWhinney SR, Bender BU, Gimm O, Franke G, Schipper J, Klisch J, Altehoefer C, Zerres K, Januszewicz A, Eng C, Smith WM, Munk R, Manz T, Glaesker S, Apel TW, Treier M, Reineke M, Walz MK, Hoang-Vu C, Brauckhoff M, Klein-Franke A, Klose P, Schmidt H, Maier-Woelfle M, Peçzkowska M, Szmigielski C, Eng C, Freiburg-Warsaw-Columbus Pheochromocytoma Study Group. Germ-line mutations in nonsyndromic pheochromocytoma. *N Engl J Med* 2002;**346**:1459–66.

32 Benn DE, Gimenez-Roqueplo AP, Reilly JR, Bertherat J, Burgess J, Byth K, Croxson M, Dahia PLM, Elston M, Gimm O, Henley D, Herman P, Murday V, Niccoli-Sire P, Pasieka JL, Rohmer V, Tucker K, Jeunemaitre X, Marsh DJ, Plouin PF, Robinson BG. Clinical presentation and penetrance of pheochromocytoma/paraganglioma syndromes. *J Clin Endocrinol Metab* 2006;**91**:827–36.

33 Mai PL, Best AF, Peters JA, DeCastro RM, Khincha PP, Loud JT, Bremer RC, Rosenberg PS, Savage SA. Risks of first and subsequent cancers among TP53 mutation carriers in the National Cancer Institute Li-Fraumeni syndrome cohort. *Cancer* 2016;**122**:3673–81.

34 Narayanan V. Tuberous sclerosis complex: genetics to pathogenesis. *Pediatr Neurol* 2003.

35 Zhi Y, Ji H, Pan J, He P, Zhou X, Zhang H, Zhou Z, Chen Z. Downregulated XPA promotes carcinogenesis of bladder cancer via impairment of DNA repair. *Tumor Biol* 2017;**39**:1–9.

36 Lou Y, Li R, Zhang Y, Zhong R, Pei J, Xiong L, Zhang X, Han B. XPA gene rs1800975 single nucleotide polymorphism and lung cancer risk: A meta-analysis. *Tumor Biol* 2014;**35**:6607–17.

37 Ding P, Yang Y, Cheng L, Zhang X, Cheng L, Li C, Cai J. The relationship between seven common polymorphisms from five DNA repair genes and the risk for breast cancer in Northern Chinese women. *PLoS One* 2014;**9**:1–6.
